# Supplementary material for: The Effects of Foot Reflexology on Chemotherapy-Induced Nausea and Vomiting in Patients with Digestive System or Lung Cancer: Protocol for a Randomized Controlled Trial
Source: PubMed Central journal article supplement (PMC7388046; doi:10.2196/17232), 2020-07-14

**ETHICAL APPROVAL**

Study Title: *Randomized study assessing the benefits of foot reflexology in patients with gastrointestinal or thoracic cancer with chemotherapy (REFYO-R Trial).*

The Committee considered the information on this project at its meeting on April 03, 2018.

The Committee adopted the following deliberation for their review: FAVOURABLE OPINION.

Document validated by the Sponsor.

Done at Lyon on October 10, 2019.

**Director of Clinical Research and Innovation Department**

**Lucilla MANSUY**

Par Délégation, la Directrice de la Recherche  
Clinique et de l'Innovation



Supplement: resprot_v9i7e17232_app1.pdf [file resprot_v9i7e17232_app1.pdf]
